# Supplementary material for: Large piezoelectric strain with ultra-low strain hysteresis in highly c-axis oriented Pb(Zr0.52Ti0.48)O3 films with columnar growth on amorphous glass substrates
Source: PubMed Central journal article supplement (PMC5635137; doi:10.1038/s41598-017-13425-w), 2017-10-10
Supplement: 41598_2017_13425_MOESM1_ESM.pdf [file 41598_2017_13425_MOESM1_ESM.pdf]

# Supplementary Information

Large piezoelectric strain with ultra-low hysteresis in highly *c*-axis oriented  $\text{Pb}(\text{Zr}_{0.52}\text{Ti}_{0.48})\text{O}_3$  films with columnar growth on amorphous glass substrates

Minh D. Nguyen<sup>1,2,3,\*</sup>, Evert P. Houwman<sup>1</sup>, and Guus Rijnders<sup>1</sup>

<sup>1</sup>Inorganic Materials Science, MESA+ Institute for Nanotechnology, University of Twente, P.O. Box 217, 7500AE Enschede, The Netherlands

<sup>2</sup>Solmates B.V., Drienerlolaan 5, 7522NB Enschede, The Netherlands

<sup>3</sup>International Training Institute for Materials Science, Hanoi University of Science and Technology, Dai Co Viet 1, Hanoi 10000, Vietnam

\* E-mail: [d.m.nguyen@utwente.nl](mailto:d.m.nguyen@utwente.nl)

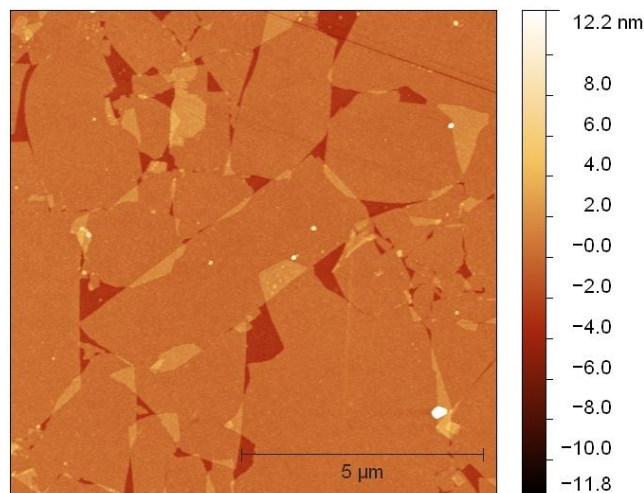

**Figure S1.** AFM image of a monolayer  $\text{Ca}_2\text{Nb}_3\text{O}_{10}$  (CNOns) nanosheet on an amorphous glass substrate. The thickness of a monolayer of CNOns is about 2.6 nm.

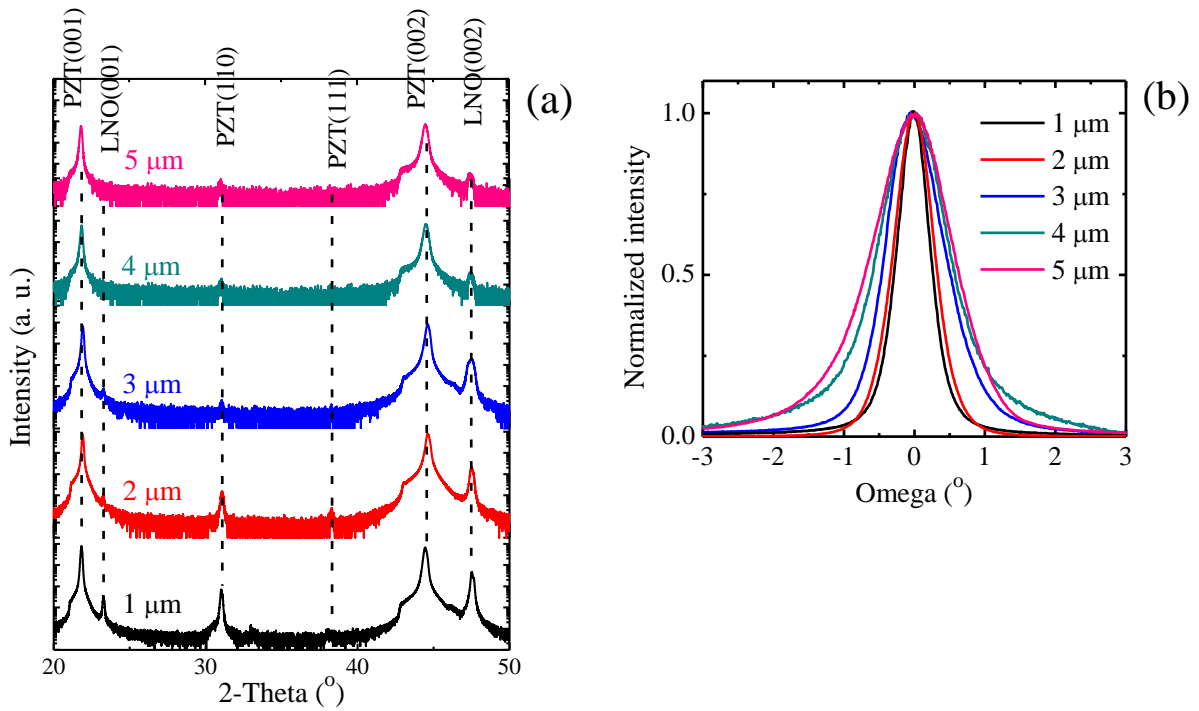

**Figure S2.** XRD patterns of (a)  $\theta$ - $2\theta$  scan and (b) rocking curve, of PZT films grown on LNO/CNOs/glass as a function of film thickness.

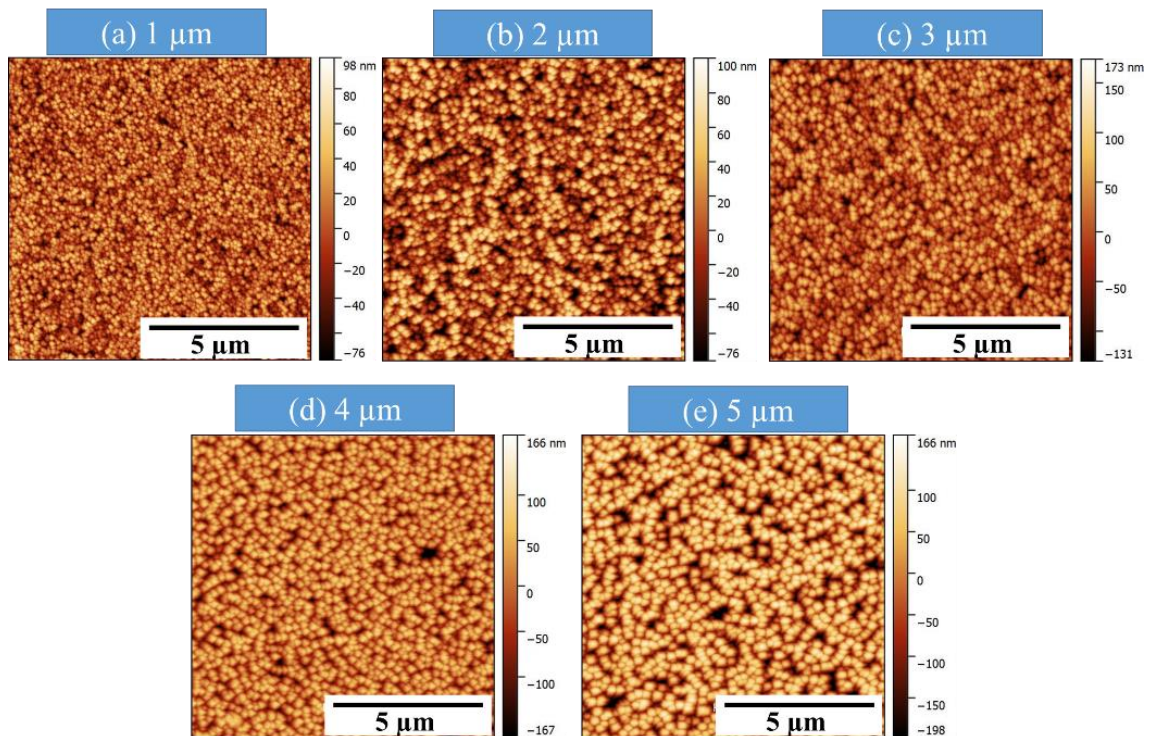

**Figure S3.** AFM images of PZT films with various thicknesses deposited on LNO/CNOs/glass.

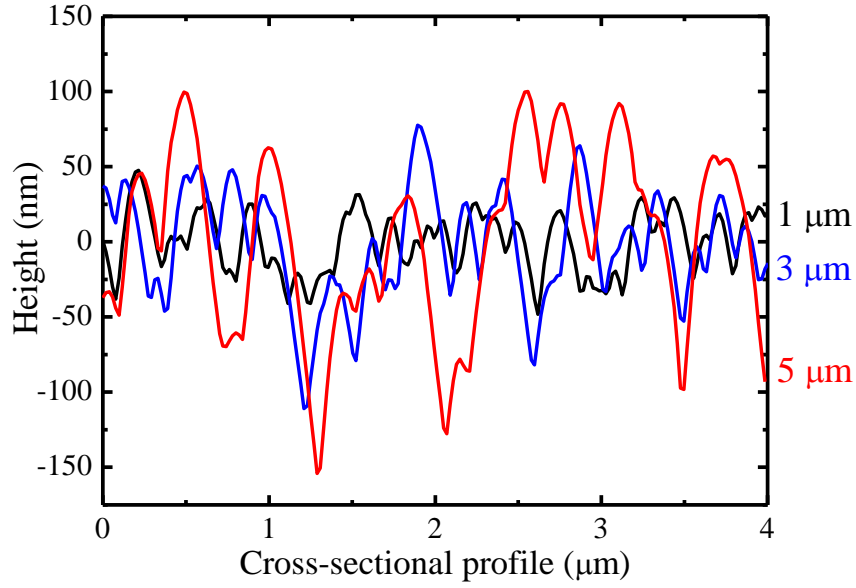

**Figure S4.** Height profiles of the PZT films grown on CNOs/glass substrates extracted from digitized AFM images for different thicknesses.

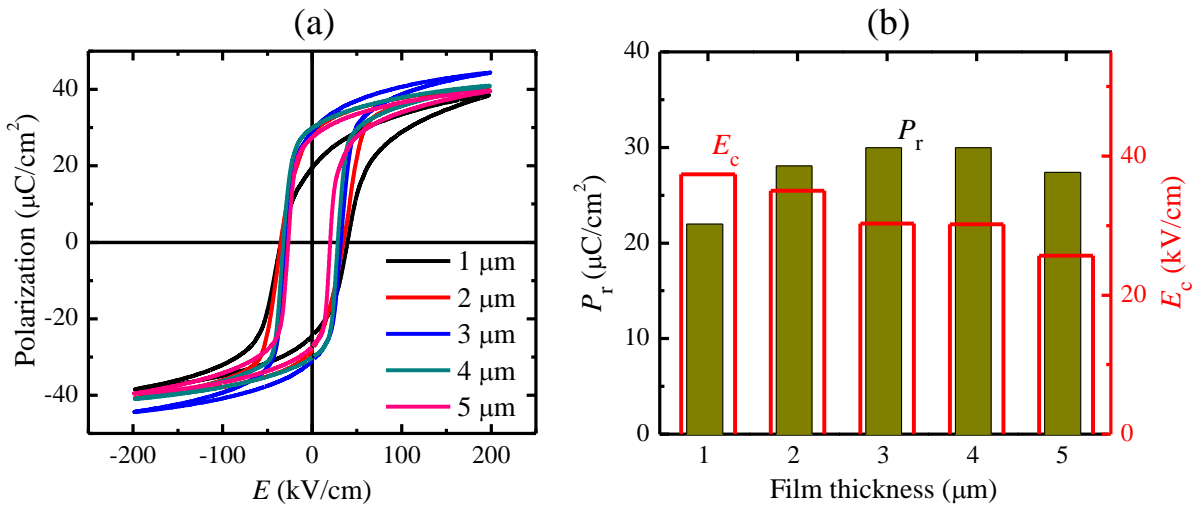

**Figure S5.** (a) Ferroelectric polarization hysteresis ( $P$ - $E$ ) loops and (b) remanent polarization ( $P_r$ ) and coercive field ( $E_c$ ) values, of PZT films with various thicknesses deposited on LNO/CNOs/glass.

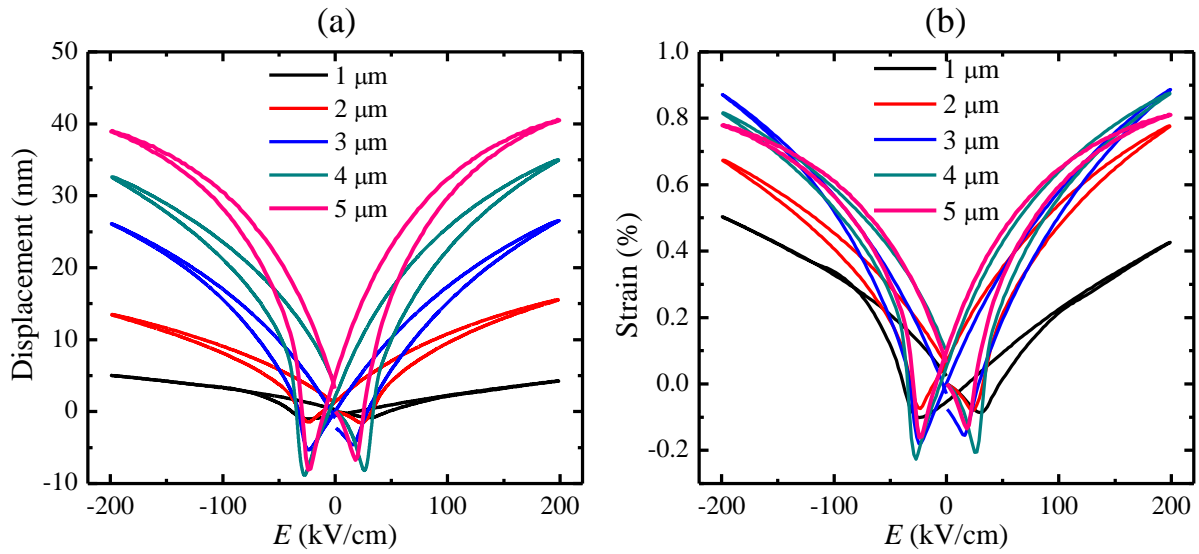

**Figure S6.** Large-signal bipolar (a) piezoelectric displacement versus  $E$ -field ( $D$ - $E$ ) and (b) piezoelectric strain versus  $E$ -field ( $S$ - $E$ ) loops of PZT films with different film thicknesses deposited on LNO/CNOs/glass.

Figure S6a and b presents the typical butterfly-shaped piezoelectric displacement and piezoelectric strain curves of PZT films with various thicknesses, driven at increasing  $ac$  electric fields. The butterfly-like appearance of the displacement loops is attributed to the nature of domain motion and the piezoelectric properties of the PZT materials.

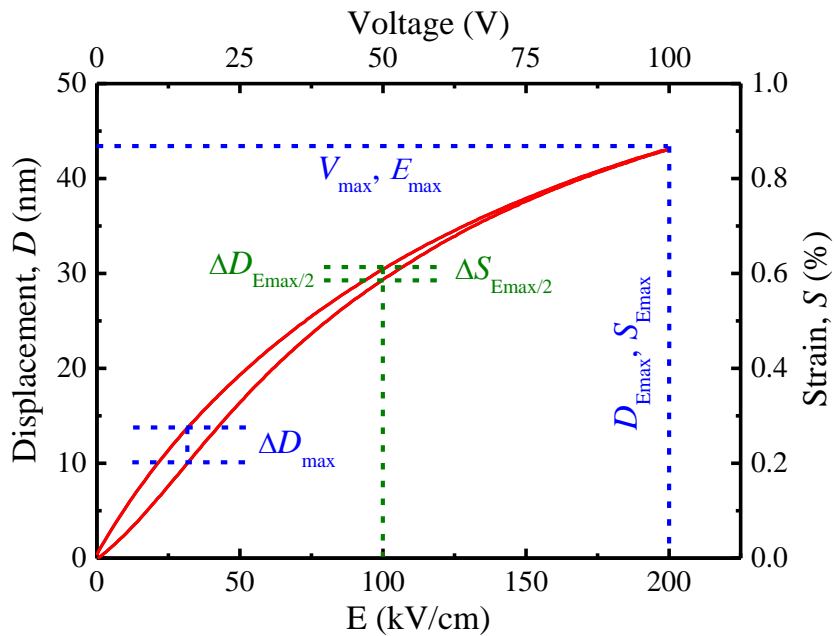

**Figure S7.** Piezoelectric strain hysteresis loop of 5- $\mu$ m-thick PZT film deposited on LNO/CNOs/glass.

From the unipolar piezoelectric displacement (strain) – electric field (voltage) loop, as shown in Fig. S7, the large-field piezoelectric strain coefficient ( $d_{33}^*$ ), as an important parameter for actuator application, and the strain hysteresis ( $H$ ), related to the piezoelectric loss, can be calculated as:

$$S(\%) = \frac{D}{t} \times 100 \quad (\text{S1})$$

$$d_{33}^* = \frac{D_{E_{max}}}{V_{max}} = \frac{S_{E_{max}}}{E_{max}} \quad (\text{S2})$$

$$H(\%) = \frac{\Delta S_{E_{max}/2}}{S_{E_{max}}} \times 100 = \frac{\Delta D_{E_{max}/2}}{D_{E_{max}}} \times 100 \quad (\text{S3})$$

where,  $t$  is the thickness of PZT film.
